# Supplementary material for: Cordycepin Decreases Ischemia/Reperfusion Injury in Diabetic Hearts via Upregulating AMPK/Mfn2-dependent Mitochondrial Fusion
Source: PubMed Central journal article supplement (PMC8563605; doi:10.3389/fphar.2021.754005), 2021-10-20
Supplement: DataSheet1.pdf [file DataSheet1.pdf]

## *Supplementary Material*

### Supplementary Figures

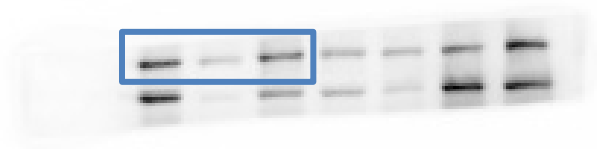

**Supplementary Figure 1:** Full uncropped images of western blots shown in Figure 2C-1

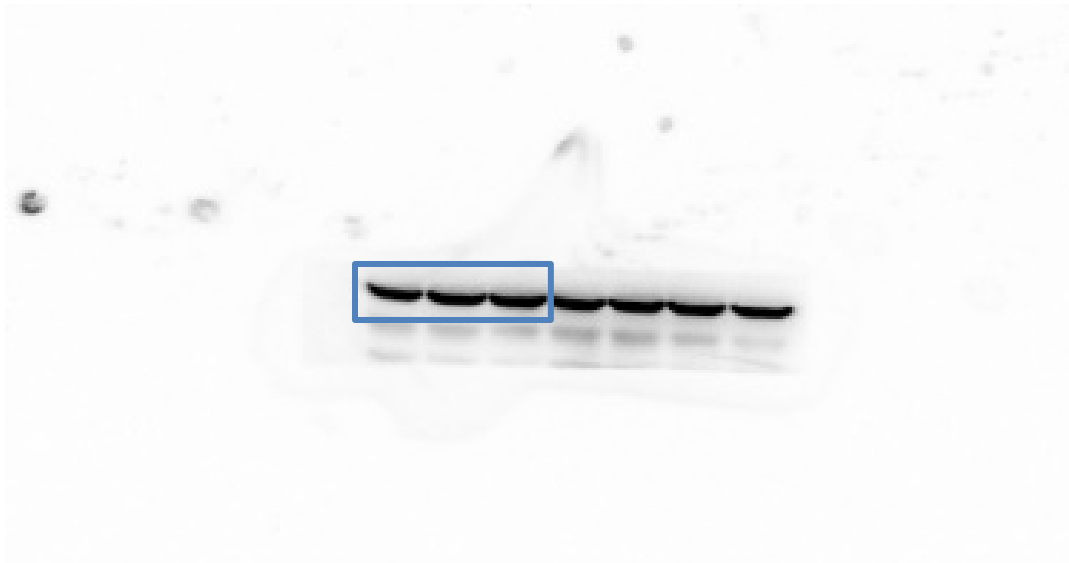

**Supplementary Figure 2:** Full uncropped images of western blots shown in Figure 2C-2

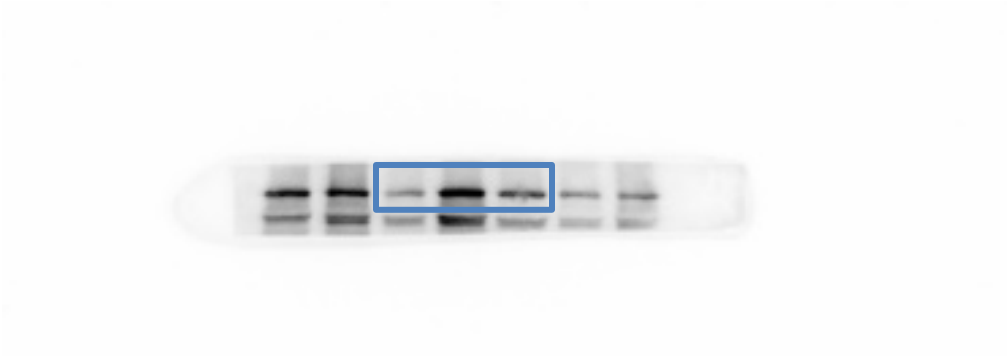

**Supplementary Figure 3:** Full uncropped images of western blots shown in Figure 3G-1

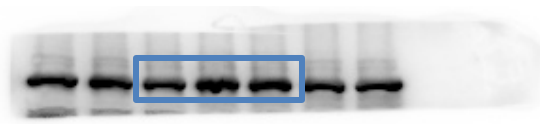

**Supplementary Figure 4:** Full uncropped images of western blots shown in Figure 3G-2

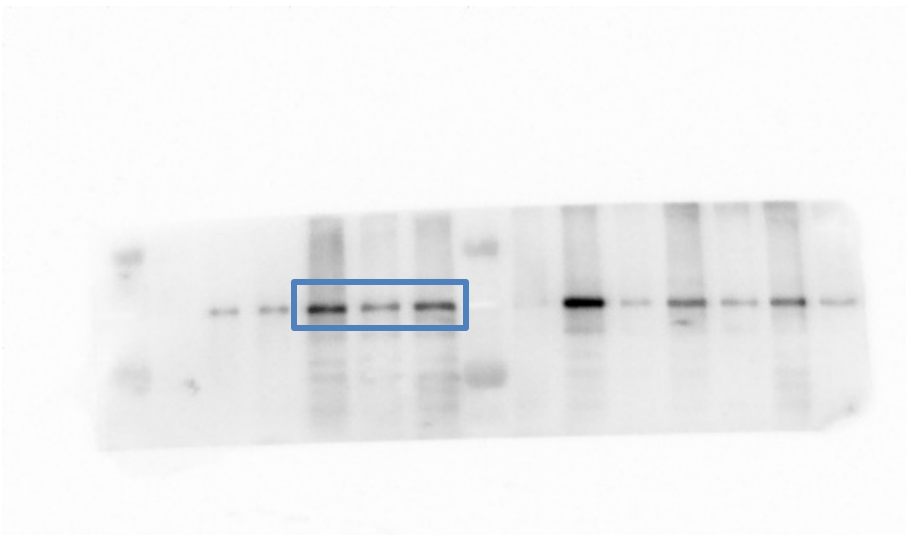

**Supplementary Figure 5:** Full uncropped images of western blots shown in Figure 4B-1

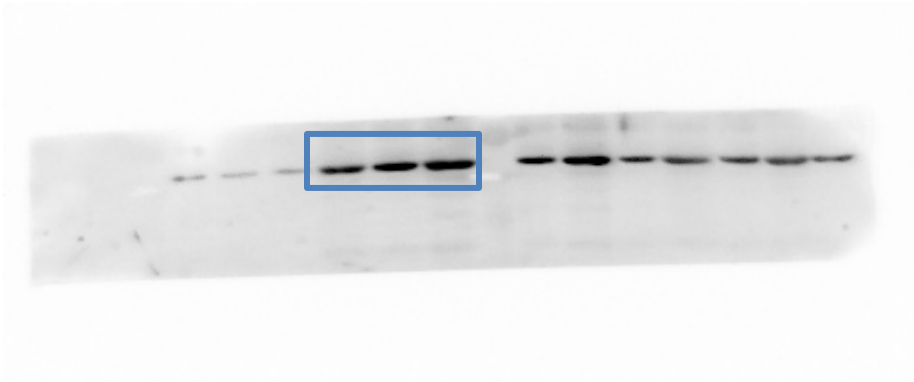

**Supplementary Figure 6:** Full uncropped images of western blots shown in Figure 4B-2

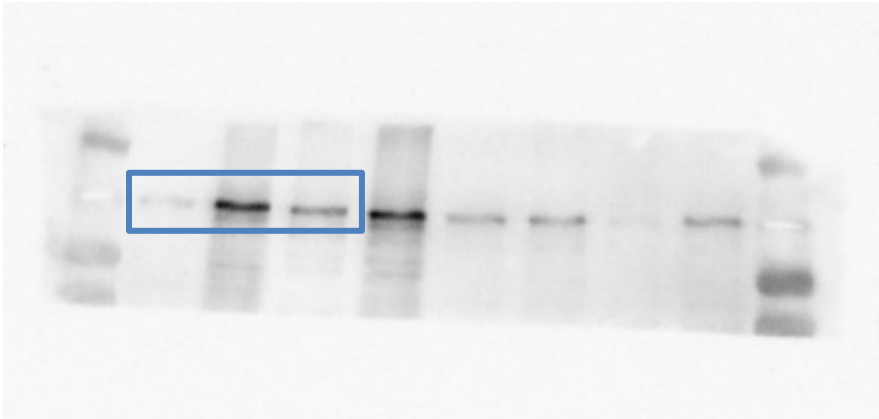

**Supplementary Figure 7:** Full uncropped images of western blots shown in Figure 4B-3

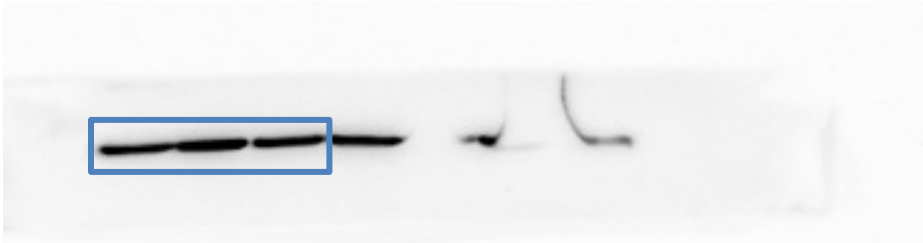

**Supplementary Figure 8:** Full uncropped images of western blots shown in Figure 4B-4

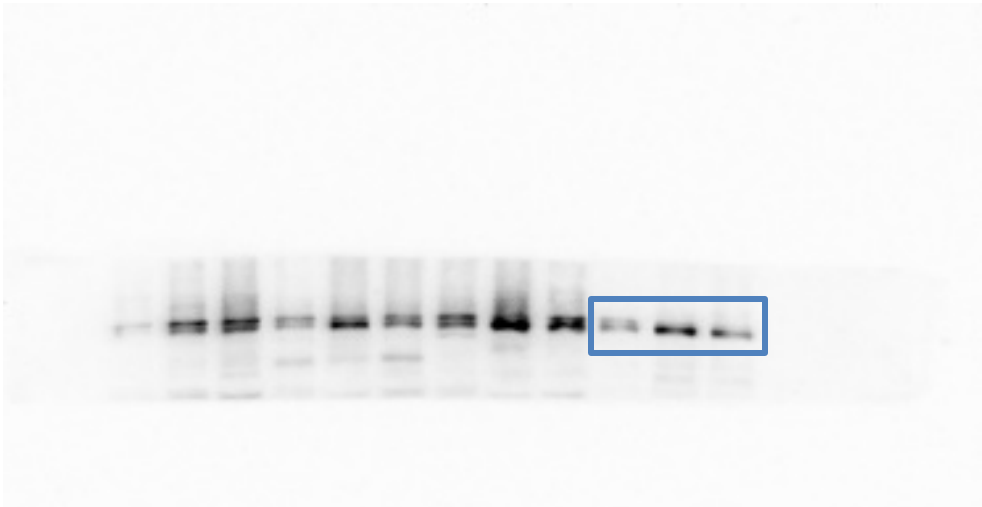

**Supplementary Figure 9:** Full uncropped images of western blots shown in Figure 4C-1

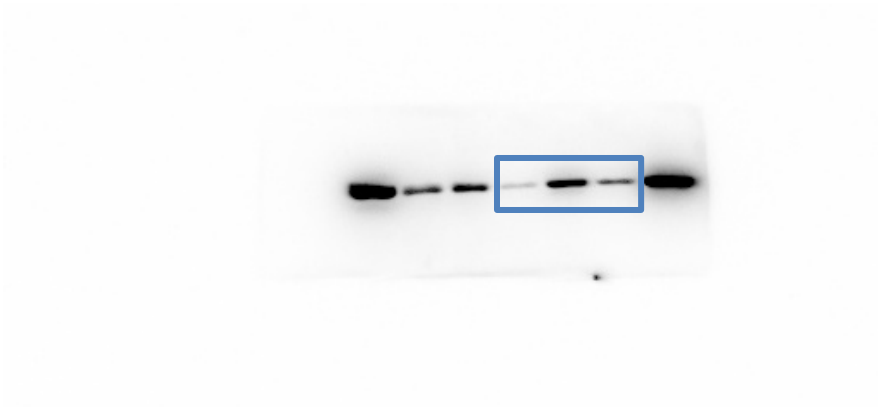

**Supplementary Figure 10:** Full uncropped images of western blots shown in Figure 4C-2

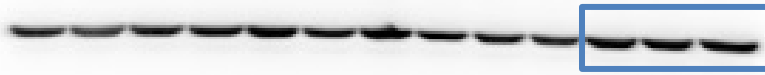

**Supplementary Figure 11:** Full uncropped images of western blots shown in Figure 4C-3

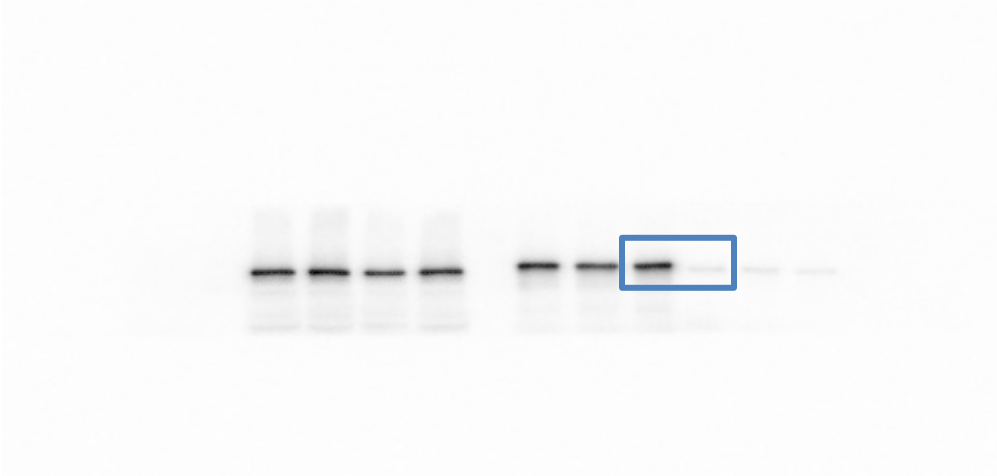

**Supplementary Figure 12:** Full uncropped images of western blots shown in Figure 5A-1

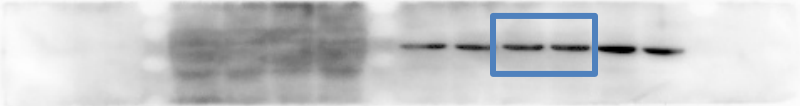

**Supplementary Figure 13:** Full uncropped images of western blots shown in Figure 5A-2

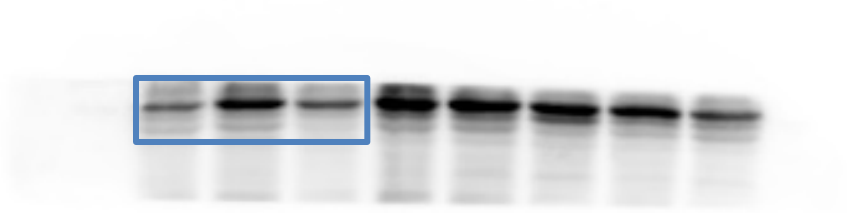

**Supplementary Figure 14:** Full uncropped images of western blots shown in Figure 6A-1

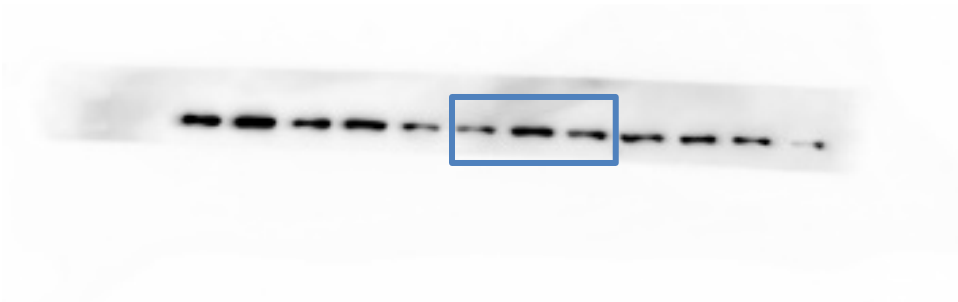

**Supplementary Figure 15:** Full uncropped images of western blots shown in Figure 6A-2

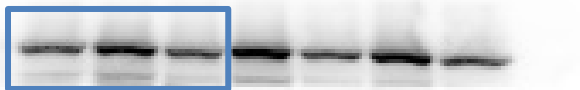

**Supplementary Figure 16:** Full uncropped images of western blots shown in Figure 6A-3

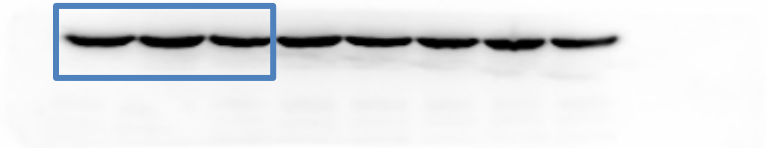

**Supplementary Figure 17:** Full uncropped images of western blots shown in Figure 6A-4

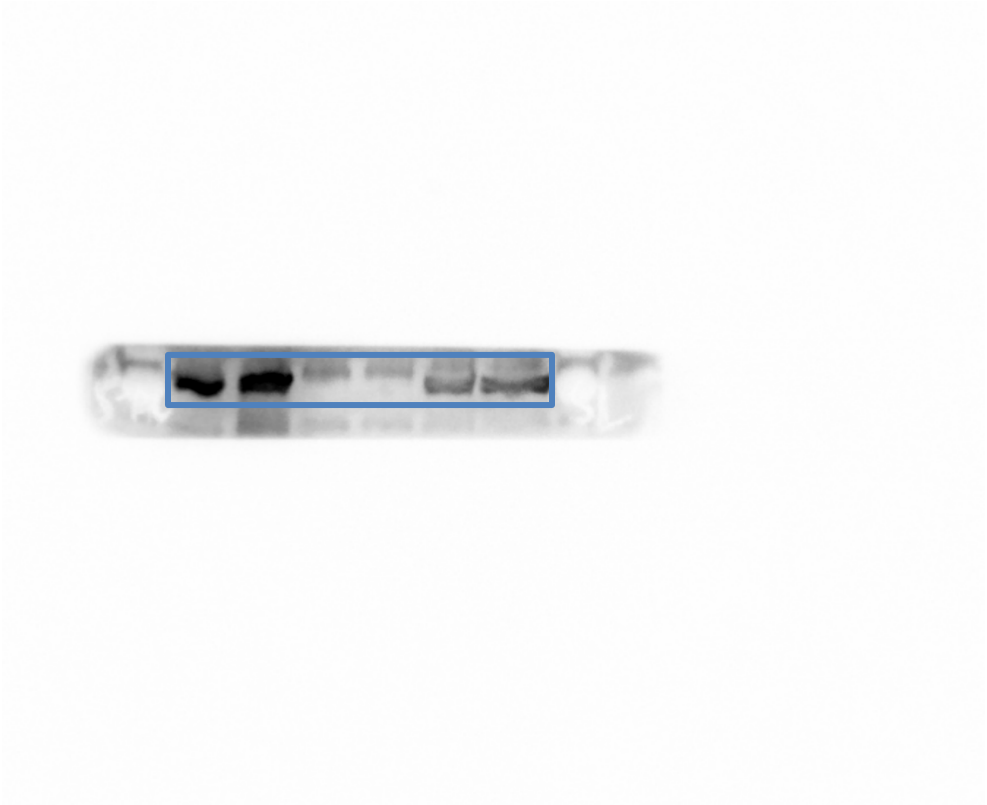

**Supplementary Figure 18:** Full uncropped images of western blots shown in Figure 6B-1

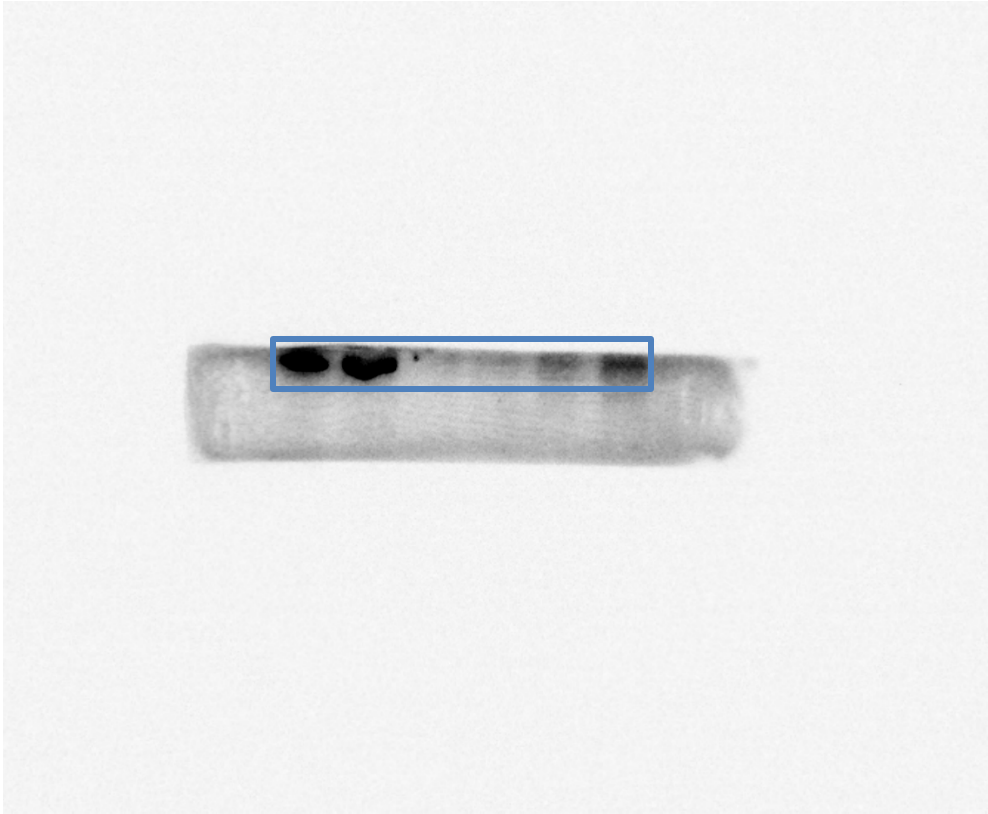

**Supplementary Figure 19:** Full uncropped images of western blots shown in Figure 6B-2



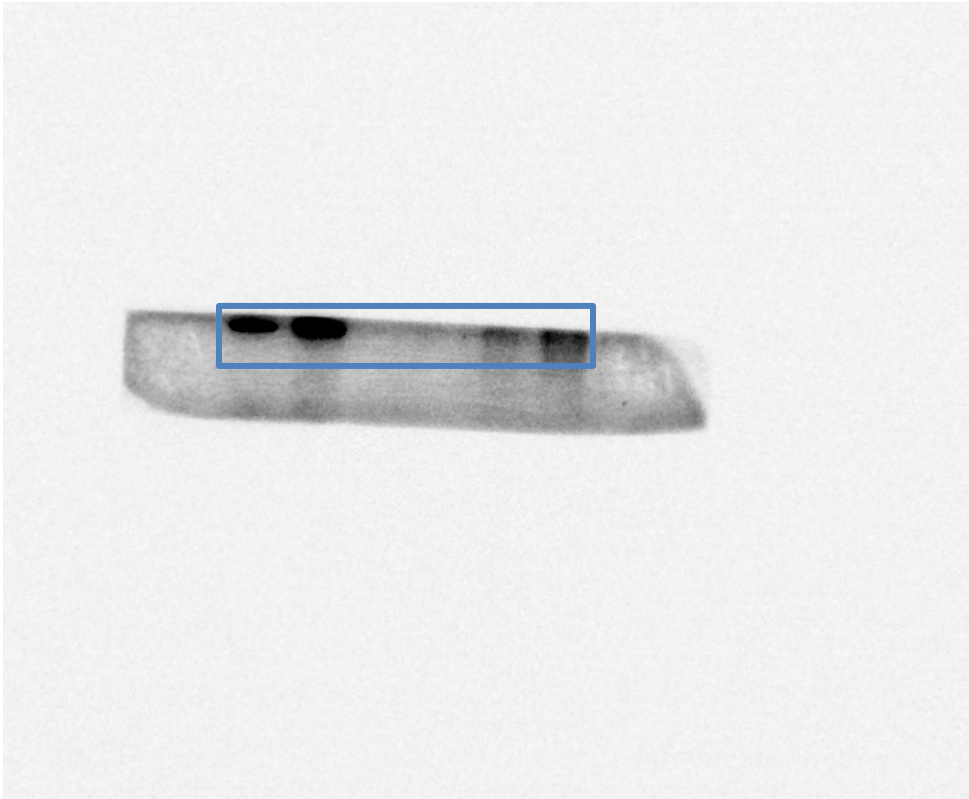

**Supplementary Figure 20:** Full uncropped images of western blots shown in Figure 6B-3

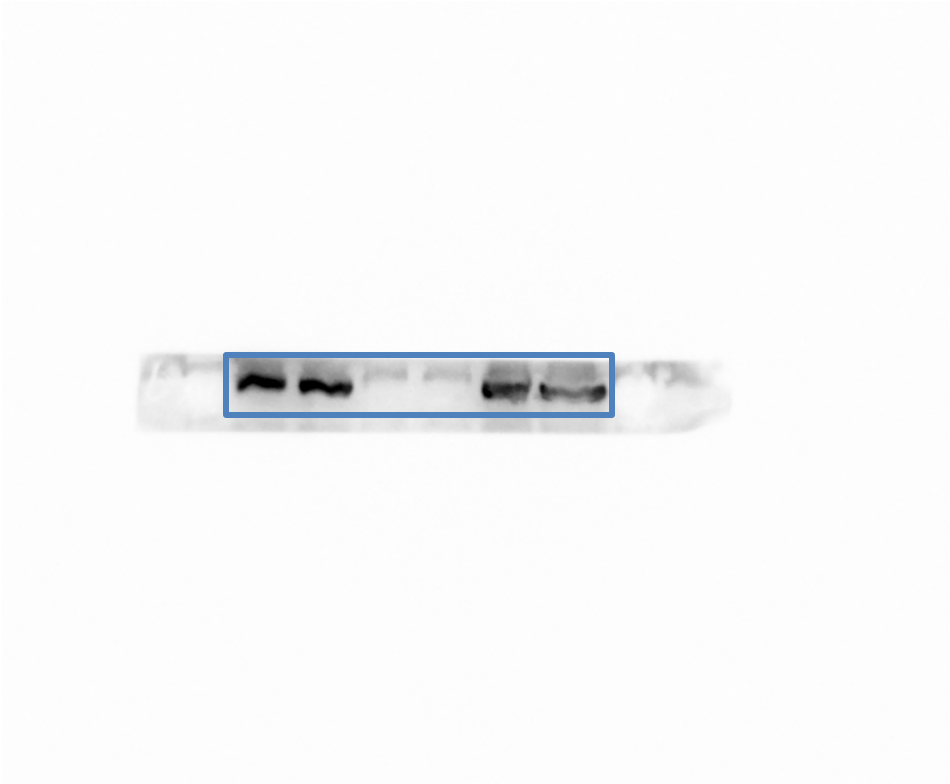

**Supplementary Figure 21:** Full uncropped images of western blots shown in Figure 6B-4
